# Supplementary material for: Age- and sex-related differences in upper-body joint and endpoint kinematics during a drinking task in healthy adults
Source: PeerJ. 2023 Dec 19;11:e16571. doi: 10.7717/peerj.16571 (PMC10740664; doi:10.7717/peerj.16571)
Supplement: Supplemental Information 2 — The text in bold font indicates p < 0.05, η2 ≥ 0.14 or Choen’s d ≥ 0.8. SPT indicates the starting timepoint, and APT indicates the endpoint (i.e., achievement timepoint). [file peerj-11-16571-s002.xlsx]

## Sheet: Joint angle statistics
Variables	Timepoints	Two-way ANOVA									Tukey's HSD test
		Age effect			Sex effect			Age+sex interaction effect			Young male vs. Young female			Young male vs. Old male			Young male vs. Old female			Young female vs. Old male			Young female vs. Old female			Old male vs. Old female
		F-value	p-value	η2	F-value	p-value	η2	F-value	p-value	η2	t-value	p-value	Choen's d	t-value	p-value	Choen's d	t-value	p-value	Choen's d	t-value	p-value	Choen's d	t-value	p-value	Choen's d	t-value	p-value	Choen's d
Shoulder Flexion/Extension	SPT in Reaching	0.464583	0.501089	0.0155562	0.126481	0.724775	0.0042351	1.07034	0.309722	0.0358394
Shoulder Flexion/Extension	APT in Reaching	0.00655591	0.936043	0.000233765	0.0373254	0.848199	0.00133093	0.00138419	0.970586	4.93564e-05
Shoulder Flexion/Extension	APT in Bringing forward	1.1893	0.2848	0.0269822	6.9215	0.0137	0.157035	7.0964	0.0127	0.161002	-0.02	1	0.01	2.84	0.0393	1.37	1.09	0.6989	0.76	2.63	0.062	1.09	-1.05	0.7226	0.54	3.74	0.0044	2
Shoulder Flexion/Extension	APT in Returning	0.0719	0.7905	0.00255904	0.0338	0.8555	0.00120207	0.0024	0.9616	8.41232e-05
Shoulder Flexion/Extension	APT in Withdrawing	0.4199	0.5223	0.0142715	0.0497	0.8252	0.00168868	0.785	0.3832	0.0266826
Shoulder Abduction/Adduction	SPT in Reaching	0.0228481	0.880936	0.000606062	8.28969	0.00755714	0.219892	1.32096	0.260142	0.0350398
Shoulder Abduction/Adduction	APT in Reaching	0.560748	0.460204	0.0123556	16.8116	0.000321031	0.370428	0.0407481	0.841484	0.000897847
Shoulder Abduction/Adduction	APT in Bringing forward	0.2261	0.6381	0.00424129	19.866	0.0001	0.372676	5.4056	0.0275	0.101407	-4.8	0.0003	2.38	1.4	0.511	0.86	-2.82	0.0414	1.43	-3.49	0.0083	1.74	-1.87	0.2648	0.8	-1.51	0.4465	0.77
Shoulder Abduction/Adduction	APT in Returning	0.0719	0.7905	0.001252	29.377	<.0001	0.511356	0.0024	0.9613	4.17175e-05
Shoulder Abduction/Adduction	APT in Withdrawing	0.0289	0.8663	0.000762182	8.8145	0.0061	0.23286	0.9521	0.3376	0.0251514
Shoulder Internal/External rotation	SPT in Reaching	0.0963575	0.758544	0.00203169	19.0908	0.000155031	0.402528	0.200125	0.658061	0.00421963
Shoulder Internal/External rotation	APT in Reaching	3.24961	0.0822147	0.0944593	1.00197	0.325406	0.0291252	2.82357	0.104014	0.0820752
Shoulder Internal/External rotation	APT in Bringing forward	0.017	0.8973	0.000379133	12.6663	0.0014	0.282879	3.964	0.0563	0.088528
Shoulder Internal/External rotation	APT in Returning	2.9826	0.0952	0.088382	0.7122	0.4059	0.0211028	2.6805	0.1128	0.0794299
Shoulder Internal/External rotation	APT in Withdrawing	0.2279	0.6368	0.00470162	20.0306	0.0001	0.413168	0.1662	0.6866	0.00342904
Elbow Flexion/Extension	SPT in Reaching	1.25632	0.271871	0.0405651	0.683702	0.415306	0.022076	0.751658	0.393321	0.0242703
Elbow Flexion/Extension	APT in Reaching	0.591787	0.44817	0.0161187	7.47595	0.0107191	0.203625	0.492362	0.488668	0.0134106
Elbow Flexion/Extension	APT in Bringing forward	3.4673	0.0731	0.10538	1.4184	0.2437	0.043108	0.0106	0.9189	0.000320897
Elbow Flexion/Extension	APT in Returning	0.3982	0.5331	0.010191	9.531	0.0045	0.243918	0.9664	0.334	0.0247319
Elbow Flexion/Extension	APT in Withdrawing	0.7983	0.3792	0.0263667	0.5416	0.4679	0.0178889	0.7201	0.4033	0.0237856
Forearm Pronation/Supination	SPT in Reaching	0.3634	0.5515	0.011152	4.2092	0.0497	0.129182	0.0326	0.8581	0.000999655
Forearm Pronation/Supination	APT in Reaching	0.956073	0.336551	0.00431222	0.363274	0.551544	0.0649332	1.01137	0.323186	0.00266323
Forearm Pronation/Supination	APT in Bringing forward	0.0414	0.8403	0.00147276	0.0586	0.8105	0.00208441	0.0103	0.92	0.000365773
Forearm Pronation/Supination	APT in Returning	0.5251	0.4747	0.0173313	1.6423	0.2105	0.054207	0.2012	0.6572	0.00664089
Forearm Pronation/Supination	APT in Withdrawing	0.2835	0.5986	0.0086067	4.6334	0.0401	0.140649	0.0514	0.8223	0.00155937
Wrist Dorsal/Palmer flexion	SPT in Reaching	0.7038	0.4086	0.0224129	2.2621	0.1438	0.072039	0.5762	0.4541	0.0183512
Wrist Dorsal/Palmer flexion	APT in Reaching	0.13	0.7211	0.0020434	1.9574	0.1728	0.0604521	0.0803	0.779	0.0211529
Wrist Dorsal/Palmer flexion	APT in Bringing forward	1.6008	0.2162	0.0537547	0.0321	0.859	0.00107943	0.0494	0.8257	0.00165877
Wrist Dorsal/Palmer flexion	APT in Returning	0.3043	0.5856	0.00987678	1.9197	0.1768	0.0623094	0.6857	0.4146	0.0222551
Wrist Dorsal/Palmer flexion	APT in Withdrawing	0.9024	0.3503	0.0290971	1.7644	0.1948	0.0568924	0.4938	0.488	0.0159222
Wrist Radial/Ulner deviation	SPT in Reaching	5.2982	0.029	0.155238	0.6485	0.4274	0.0190011	0.0186	0.8925	0.000545103
Wrist Radial/Ulner deviation	APT in Reaching	6.4482	0.0169	0.166005	4.2787	0.0479	0.110151	0.0005	0.9829	1.20014e-05
Wrist Radial/Ulner deviation	APT in Bringing forward	7.3414	0.0114	0.205186	0.4297	0.5175	0.0120087	0.062	0.8052	0.00173159
Wrist Radial/Ulner deviation	APT in Returning	5.1639	0.0309	0.14482	2.0798	0.1604	0.0583269	0.1252	0.7261	0.00351144
Wrist Radial/Ulner deviation	APT in Withdrawing	5.9514	0.0213	0.169924	0.5118	0.4803	0.0146143	0.1918	0.6647	0.0054776
Neck Flexion/Extension	SPT in Reaching	0.978189	0.331117	0.0309794	0.456219	0.504937	0.0144485	1.76391	0.194863	0.0558633
Neck Flexion/Extension	APT in Reaching	1.36062	0.25327	0.0425512	0.212893	0.648074	0.00665791	1.93775	0.174872	0.0606003
Neck Flexion/Extension	APT in Bringing forward	2.2873	0.1416	0.0525365	1.4236	0.2428	0.0326992	10.3866	0.0032	0.238572	3.12	0.0203	1.74	-3.58	0.0066	2.02	1.91	0.2456	1.02	-0.23	0.9958	0.11	1.14	0.6683	0.51	-1.44	0.4888	0.66
Neck Flexion/Extension	APT in Returning	2.3228	0.1387	0.0688459	0.0949	0.7603	0.00281262	2.6173	0.1169	0.0775738
Neck Flexion/Extension	APT in Withdrawing	0.018	0.8944	0.000551974	0.4025	0.5309	0.0123738	3.977	0.0559	0.122262
Trunk Flexion/Extension	SPT in Reaching	0.633004	0.432949	0.0175564	5.13696	0.0313412	0.142474	1.96136	0.172353	0.0543984
Trunk Flexion/Extension	APT in Reaching	0.695447	0.411376	0.0200914	4.25468	0.0485286	0.122917	1.38206	0.24965	0.0399276
Trunk Flexion/Extension	APT in Bringing forward	1.0037	0.325	0.0263115	7.1346	0.0125	0.18703	1.6407	0.2107	0.0430101
Trunk Flexion/Extension	APT in Returning	0.3465	0.5608	0.00980821	5.0196	0.0332	0.142071	1.7352	0.1984	0.0491116
Trunk Flexion/Extension	APT in Withdrawing	0.3177	0.5775	0.00872916	5.4035	0.0276	0.148488	2.4037	0.1323	0.0660535
