# Supplementary material for: Age- and sex-related differences in upper-body joint and endpoint kinematics during a drinking task in healthy adults
Source: PeerJ. 2023 Dec 19;11:e16571. doi: 10.7717/peerj.16571 (PMC10740664; doi:10.7717/peerj.16571)
Supplement: Supplemental Information 3 — The text in bold font indicates p < 0.05. SD indicates standard deviation. [file peerj-11-16571-s003.xlsx]

## Sheet: Endpoint description
Variables	Phases	Age groups				Sex groups				Age+sex groups
		Young		Old		Male		Female		Young male		Young female		Old male		Old female
		Mean	SD	Mean	SD	Mean	SD	Mean	SD	Mean	SD	Mean	SD	Mean	SD	Mean	SD
Total time (sec)	Total	5.99667	1.06033	6.78313	1.06755	6.52963	1.16911	6.21024	1.06945	5.95519	0.975761	6.05	1.2391	7.10407	1.09995	6.37048	0.939565
Time (sec)	Reaching	1.01333	0.223584	1.18521	0.211929	1.15093	0.241035	1.03286	0.208002	1.06481	0.248893	0.947143	0.182457	1.23704	0.211722	1.11857	0.208103
Time (sec)	Bringing forward	2.17313	0.606094	2.40937	0.5152	2.22741	0.573311	2.37333	0.56724	1.99556	0.434546	2.40143	0.747326	2.45926	0.62344	2.34524	0.369879
Time (sec)	Returning	1.67417	0.310139	1.79625	0.264438	1.75796	0.29138	1.70595	0.296945	1.65222	0.321585	1.70238	0.317687	1.8637	0.22769	1.70952	0.300157
Time (sec)	Withdrawing	1.15979	0.262316	1.39229	0.371808	1.41444	0.361645	1.0981	0.201289	1.28481	0.244354	0.999048	0.197031	1.54407	0.424741	1.19714	0.16148
Time ratio (%)	Reaching	17.04	2.86863	17.4973	2.0679	17.7123	2.66809	16.6983	2.15077	17.98	3.2647	15.8314	1.82538	17.4445	2.07551	17.5651	2.22202
Time ratio (%)	Bringing forward	35.895	4.77517	35.4299	3.61052	33.8849	3.78016	37.9478	3.57754	33.3958	3.11029	39.1082	4.76367	34.374	4.48924	36.7874	1.37703
Time ratio (%)	Returning	28.1419	2.78263	26.6211	2.43088	27.2471	3.10412	27.5543	2.12568	27.9981	3.2768	28.3269	2.22939	26.4961	2.91019	26.7817	1.85126
Time ratio (%)	Withdrawing	18.923	3.56385	20.4518	3.65984	21.1557	3.83677	17.7996	2.33994	20.626	3.17956	16.7334	2.88607	21.6853	4.53222	18.8658	0.938782
Peak velocity (mm/sec)	Reaching	857.972	139.17	823.698	120.025	864.204	143.61	810.789	104.859	875.253	163.679	835.753	108.054	853.155	129.461	785.825	103.409
Peak velocity (mm/sec)	Bringing forward	727.619	109.638	621.845	124.367	667.38	125.265	684.185	133.832	723.195	85.6306	733.308	142.152	611.566	137.848	635.062	113.884
Peak velocity (mm/sec)	Returning	848.619	144.621	816.657	139.845	799.312	147.167	828.99	109.506	841.97	162.155	857.168	130.68	756.654	125.039	800.812	83.9764
Peak velocity (mm/sec)	Withdrawing	832.167	174.376	775.973	108.033	837.634	97.5402	807.413	211.668	848.169	55.2205	811.593	266.596	827.098	130.071	803.232	161.121
Time to peak velocity (%)	Reaching	32.1774	8.58103	26.3152	5.51418	30.7958	8.69003	27.2541	5.90285	34.8033	9.81222	28.8012	5.6631	26.7883	5.29691	25.7069	6.15129
Time to peak velocity (%)	Bringing forward	18.266	2.55236	18.2896	3.62331	18.9087	3.2626	17.4666	2.73599	18.4439	2.69084	18.0372	2.55413	19.3735	3.85914	16.896	2.98926
Time to peak velocity (%)	Returning	45.7401	5.14976	42.2117	6.70379	42.4103	6.57665	45.9889	5.07913	44.9842	5.40703	46.7121	5.03583	39.8363	6.91147	45.2658	5.41434
Time to peak velocity (%)	Withdrawing	55.5803	6.81117	56.8961	9.50152	55.0622	7.51435	57.7501	8.97478	54.3528	4.74323	57.1584	8.98981	55.7717	9.81624	58.3417	9.63766
Trajectry straightness	Reaching	1.31913	0.116162	1.46447	0.278548	1.42972	0.269091	1.34304	0.137304	1.32936	0.102241	1.30598	0.139421	1.53009	0.347494	1.38009	0.134924
Trajectry straightness	Bringing forward	1.01912	0.0114418	1.02204	0.00658226	1.01662	0.00821971	1.02567	0.00827081	1.0121	0.0057129	1.02814	0.0107172	1.02115	0.00805416	1.02319	0.00436752
Trajectry straightness	Returning	1.03936	0.0195828	1.05493	0.0200847	1.04468	0.0197928	1.05032	0.0229245	1.03901	0.0173306	1.03981	0.0236184	1.05035	0.0214438	1.06082	0.0179833
Trajectry straightness	Withdrawing	1.44339	0.376844	1.50677	0.150967	1.56176	0.3448	1.36364	0.115687	1.54303	0.480685	1.31528	0.113625	1.58049	0.144178	1.412	0.103101
Normalized integrated jerk	Reaching	130140	66402.3	202674	90792.3	186479	91248.3	140600	75322.4	143677	70859.2	112735	60828.9	229280	92468.1	168465	82344.1
Normalized integrated jerk	Bringing forward	572448	473116	637327	373511	562235	415410	659725	436371	442665	323174	739311	602155	681806	479678	580140	187630
Normalized integrated jerk	Returning	302286	129287	356147	123532	337182	137924	318974	116631	286919	131287	322044	134151	387446	132300	315905	107024
Normalized integrated jerk	Withdrawing	204760	144677	344424	316306	361608	308046	162715	59532.9	264432	168167	128039	49124.7	458783	390024	197391	49600.1
