# Supplementary material for: Age- and sex-related differences in upper-body joint and endpoint kinematics during a drinking task in healthy adults
Source: PeerJ. 2023 Dec 19;11:e16571. doi: 10.7717/peerj.16571 (PMC10740664; doi:10.7717/peerj.16571)
Supplement: Supplemental Information 4 — The text in bold font indicates p < 0.05, η2 ≥ 0.14 or Choen’s d ≥ 0.8. [file peerj-11-16571-s004.xlsx]

## Sheet: Endpoint statistics
Variables	Phases	Two-way ANOVA									Tukey's HSD test
		Age effect			Sex effect			Age+sex interaction effect			Young male vs. Young female			Young male vs. Old male			Young male vs. Old female			Young female vs. Old male			Young female vs. Old female			Old male vs. Old female
		F-value	p-value	η2	F-value	p-value	η2	F-value	p-value	η2	t-value	p-value	Choen's d	t-value	p-value	Choen's d	t-value	p-value	Choen's d	t-value	p-value	Choen's d	t-value	p-value	Choen's d	t-value	p-value	Choen's d
Total time	Total	3.7421	0.0632	0.109249	0.7072	0.4075	0.0206473	1.1895	0.2847	0.0347256
Time	Reaching	4.95522	0.0342369	0.140069	2.33969	0.137335	0.0661365	2.64294e-05	0.995935	0
Time	Bringing forward	1.0412	0.3163	0.0328976	0.5341	0.471	0.0168735	1.6947	0.2036	0.053544
Time	Returning	1.1033	0.3025	0.0360412	0.2498	0.6211	0.00815811	0.9638	0.3346	0.0314834
Time	Withdrawing	4.991	0.0336	0.11639	9.5516	0.0045	0.22274	0.0893	0.7673	0.00208298
Time ratio	Reaching	0.467313	0.499845	0.0148148	1.33887	0.25701	0.0428571	1.67608	0.206022	0.0534392
Time ratio	Bringing forward	0.2573	0.6159	0.00658261	9.4259	0.0047	0.241035	1.5537	0.2229	0.0397367
Time ratio	Returning	2.5086	0.1245	0.0820628	0.102	0.7519	0.00313901	0.0005	0.9822	0
Time ratio	Withdrawing	1.8689	0.1825	0.0490244	8.2653	0.0076	0.216341	0.2113	0.6493	0.00560976
Peak velocity	Reaching	0.592553	0.44788	0.0197932	1.30356	0.263234	0.0435432	0.0884604	0.768339	0.00295486
Peak velocity	Bringing forward	5.926	0.0215	0.172808	0.152	0.6996	0.00443161	0.0241	0.8777	0.000702755
Peak velocity	Returning	2.304	0.1403	0.0744131	0.4044	0.53	0.0130625	0.0963	0.7586	0.00310951
Peak velocity	Withdrawing	0.0644	0.8016	0.00226978	0.2714	0.6065	0.00957222	0.012	0.9135	0.000423339
Time to peak velocity	Reaching	4.81097	0.0367465	0.132353	1.9559	0.172932	0.0538126	0.943875	0.339602	0.0259804
Time to peak velocity	Bringing forward	0.0091	0.9245	0.000305499	1.6995	0.203	0.0556008	0.8761	0.3573	0.028649
Time to peak velocity	Returning	2.539	0.1223	0.0730375	2.9911	0.0947	0.0860922	0.8001	0.3787	0.0230375
Time to peak velocity	Withdrawing	0.1873	0.6685	0.0064438	0.7993	0.3789	0.0275678	0.0015	0.969	4.84496e-05
Trajectry straightness	Reaching	3.26481	0.0815395	0.0968734	1.29908	0.264038	0.0385487	0.692881	0.41223	0.0205576
Trajectry straightness	Bringing forward	0.5857	0.4505	0.0123134	11.3905	0.0022	0.240299	6.8197	0.0143	0.14403	4.23	0.0012	1.95	-2.55	0.0733	1.3	2.93	0.0321	1.31	1.85	0.2742	0.75	1.23	0.6131	0.6	0.54	0.9485	0.3
Trajectry straightness	Returning	5.0726	0.0323	0.150365	0.6164	0.439	0.0182482	0.4534	0.5062	0.0131387
Trajectry straightness	Withdrawing	0.4603	0.503	0.0141562	4.0145	0.0549	0.123441	0.0898	0.7667	0.00275936
Normalized integrated jerk	Reaching	6.42227	0.0171453	0.169599	2.70693	0.111095	0.0714846	0.286893	0.596448	0.00757628
Normalized integrated jerk	Bringing forward	0.0696	0.7938	0.00229588	0.4139	0.5252	0.0136484	1.7274	0.1994	0.0569572
Normalized integrated jerk	Returning	1.0803	0.3075	0.034882	0.1608	0.6915	0.00519217	1.3796	0.2501	0.0445463
Normalized integrated jerk	Withdrawing	2.6034	0.1178	0.0694684	5.924	0.0216	0.158072	0.7648	0.4508	0.0156091
